# Supplementary material for: Atomic layer deposition of LiF using LiN(SiMe3)2 and SF6 plasma
Source: Royal Society of Chemistry journal article supplement (doi:10.1039/d0cp05428c), 2021-01-01
Supplement: d0cp05428c1.pdf [file d0cp05428c1.pdf]

## Supporting information

### Atomic Layer Deposition of LiF using LiN(SiMe<sub>3</sub>)<sub>2</sub> and SF<sub>6</sub> plasma

N. Hornsveld,<sup>a\*</sup> W. M. M. Kessels,<sup>a</sup> R. A. Synowicki,<sup>b</sup> and M. Creatore<sup>a</sup>

<sup>a</sup>Department of Applied Physics, Eindhoven University of Technology, 5600 MB Eindhoven, The Netherlands

<sup>b</sup>J.A. Woollam Co., Inc., 645 M Street, Suite 102, Lincoln, Nebraska 68508, USA

\*E-mail: n.hornsveld@tue.nl

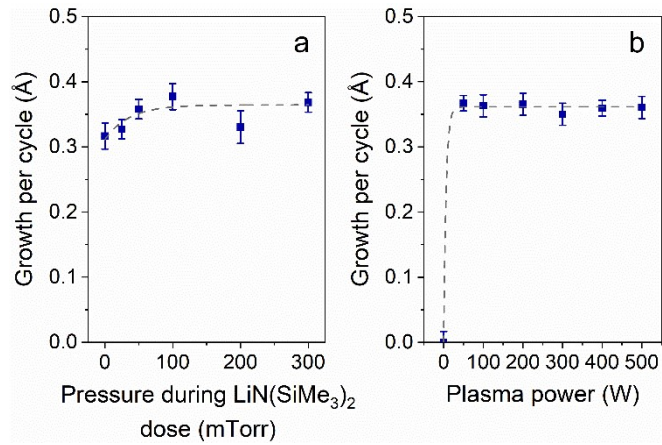

Fig. S1: Growth per cycle obtained by *in situ* SE as a function of (a) pressure during LiN(SiMe<sub>3</sub>)<sub>2</sub> dose and (b) SF<sub>6</sub> plasma power for ALD of LiF obtained at 150 °C. The precursor dose time was set to 6 s and the plasma exposure time was set to 1 s. The plasma power was set to 300 W when the pressure during LiN(SiMe<sub>3</sub>)<sub>2</sub> dose was varied and the pressure during LiN(SiMe<sub>3</sub>)<sub>2</sub> dose was set to 50 mTorr when the plasma power was varied. The dotted lines serves as a guide to the eye.

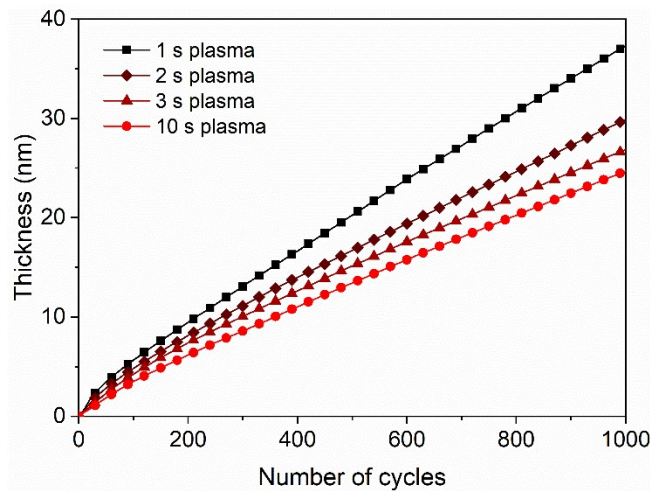

Fig. S2: Film thickness as a function of cycle number for different plasma exposure times measured by *in situ* SE. The dosing time of the LiN(SiMe<sub>3</sub>)<sub>2</sub> precursor was set to 6 s.

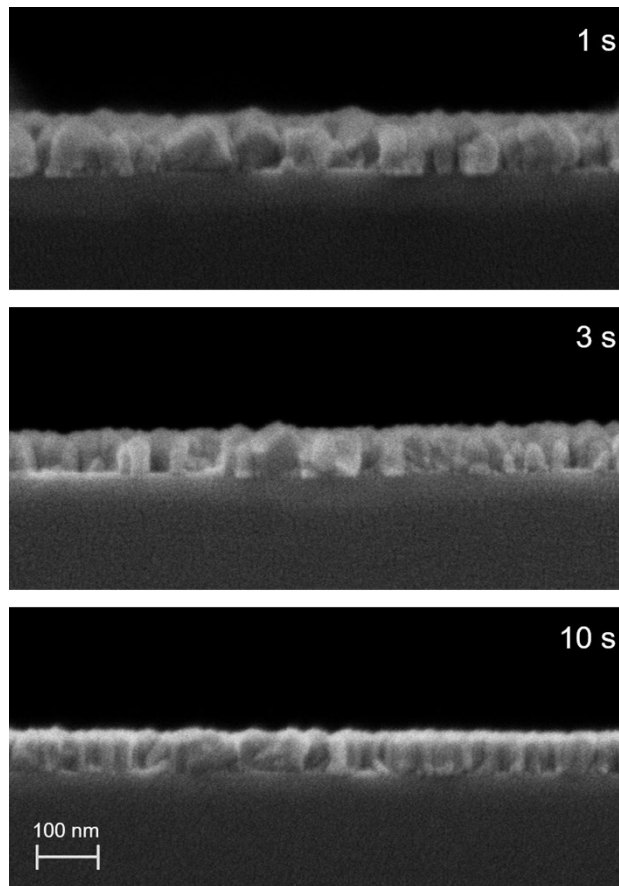

Fig. S3: High resolution SEM images showing the cross-section of LiF films deposited on Si using 2200 cycles and a 1 s, 3 s and 10 s  $\text{SF}_6$  plasma exposure, respectively. The scale bar applies to all images.

Table S1: Thicknesses and refractive index values on various locations of a 200 mm wafer with a 90 nm LiF film prepared using a plasma exposure time of 1 s. The centre of the wafer is defined as (0,0). In the first row the typical error is given for the thickness and refractive index.

| Position |        | Thickness (nm) | Refractive index n at 633 nm |
|----------|--------|----------------|------------------------------|
| x (mm)   | y (mm) |                |                              |
| -100     | 0      | 92.0 ± 0.5     | 1.375 ± 0.005                |
| -50      | 0      | 89.5           | 1.370                        |
| 0        | 0      | 90.0           | 1.375                        |
| 50       | 0      | 85.5           | 1.375                        |
| 100      | 0      | 80.0           | 1.375                        |
| 0        | 100    | 85.0           | 1.375                        |
| 0        | 50     | 88.5           | 1.380                        |
| 0        | -50    | 87.0           | 1.370                        |
| 0        | -100   | 85.5           | 1.370                        |

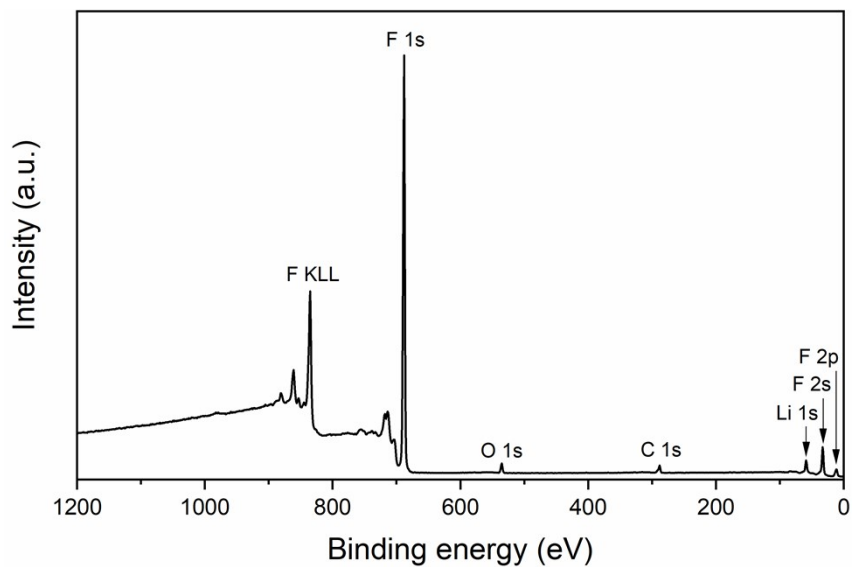

Fig. S4: XPS survey spectrum of a lithium fluoride film grown at 150 °C using 1 s plasma exposure. The spectra for 3 s and 10 s plasma exposure are very similar and therefore not shown.

Table S2: Stoichiometry of LiF films deposited at 150 °C using different plasma exposure times.

| Sample                      | F/Li | C (at%)   | O (at%)   | H (at%)   |
|-----------------------------|------|-----------|-----------|-----------|
| <i>1 s plasma duration</i>  |      |           |           |           |
| XPS surface                 | 0.80 | 9.0 ± 0.5 | 4.5 ± 0.5 | -         |
| XPS depth profiling         | 0.81 | 0.5 ± 0.5 | 0.5 ± 0.5 | -         |
| RBS/ERD                     | 0.78 | 0.8 ± 0.1 | 1.1 ± 0.1 | 0.9 ± 0.1 |
| <i>3 s plasma duration</i>  |      |           |           |           |
| XPS surface                 | 0.80 | 6.0 ± 0.5 | 4.0 ± 0.5 | -         |
| XPS depth profiling         | 0.82 | 0.5 ± 0.5 | 0.5 ± 0.5 | -         |
| RBS/ERD                     | 0.83 | 0.9 ± 0.1 | 1.1 ± 0.1 | 0.8 ± 0.1 |
| <i>10 s plasma duration</i> |      |           |           |           |
| XPS surface                 | 0.80 | 6.5 ± 0.5 | 7.0 ± 0.5 | -         |
| XPS depth profiling         | 0.80 | 0.5 ± 0.5 | 0.5 ± 0.5 | -         |
| RBS/ERD                     | 0.75 | 1.3 ± 0.1 | 0.9 ± 0.1 | 0.7 ± 0.1 |

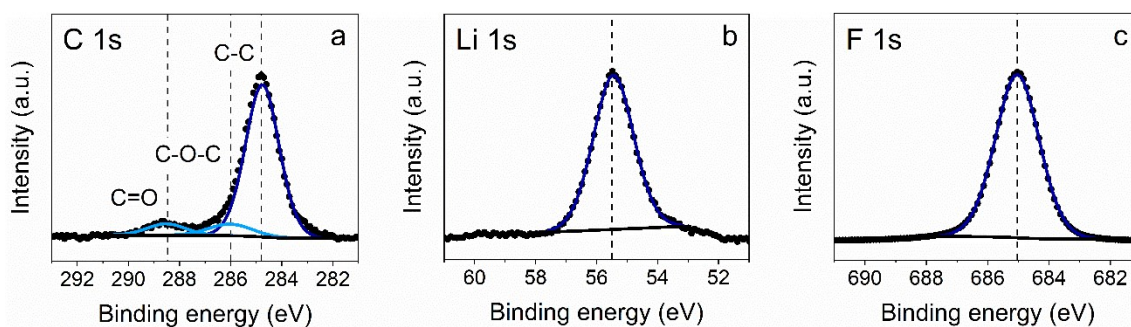

Fig. S5: (a) C 1s, (b) Li 1s, and (c) F 1s spectra of a 40 nm thick lithium fluoride film grown at 150 °C using 1 s plasma exposure time after storage in atmosphere for one month. The measured data (black dotted lines) and fitted peaks (blue lines) are reported. Carbon is detected only at the surface of the films.

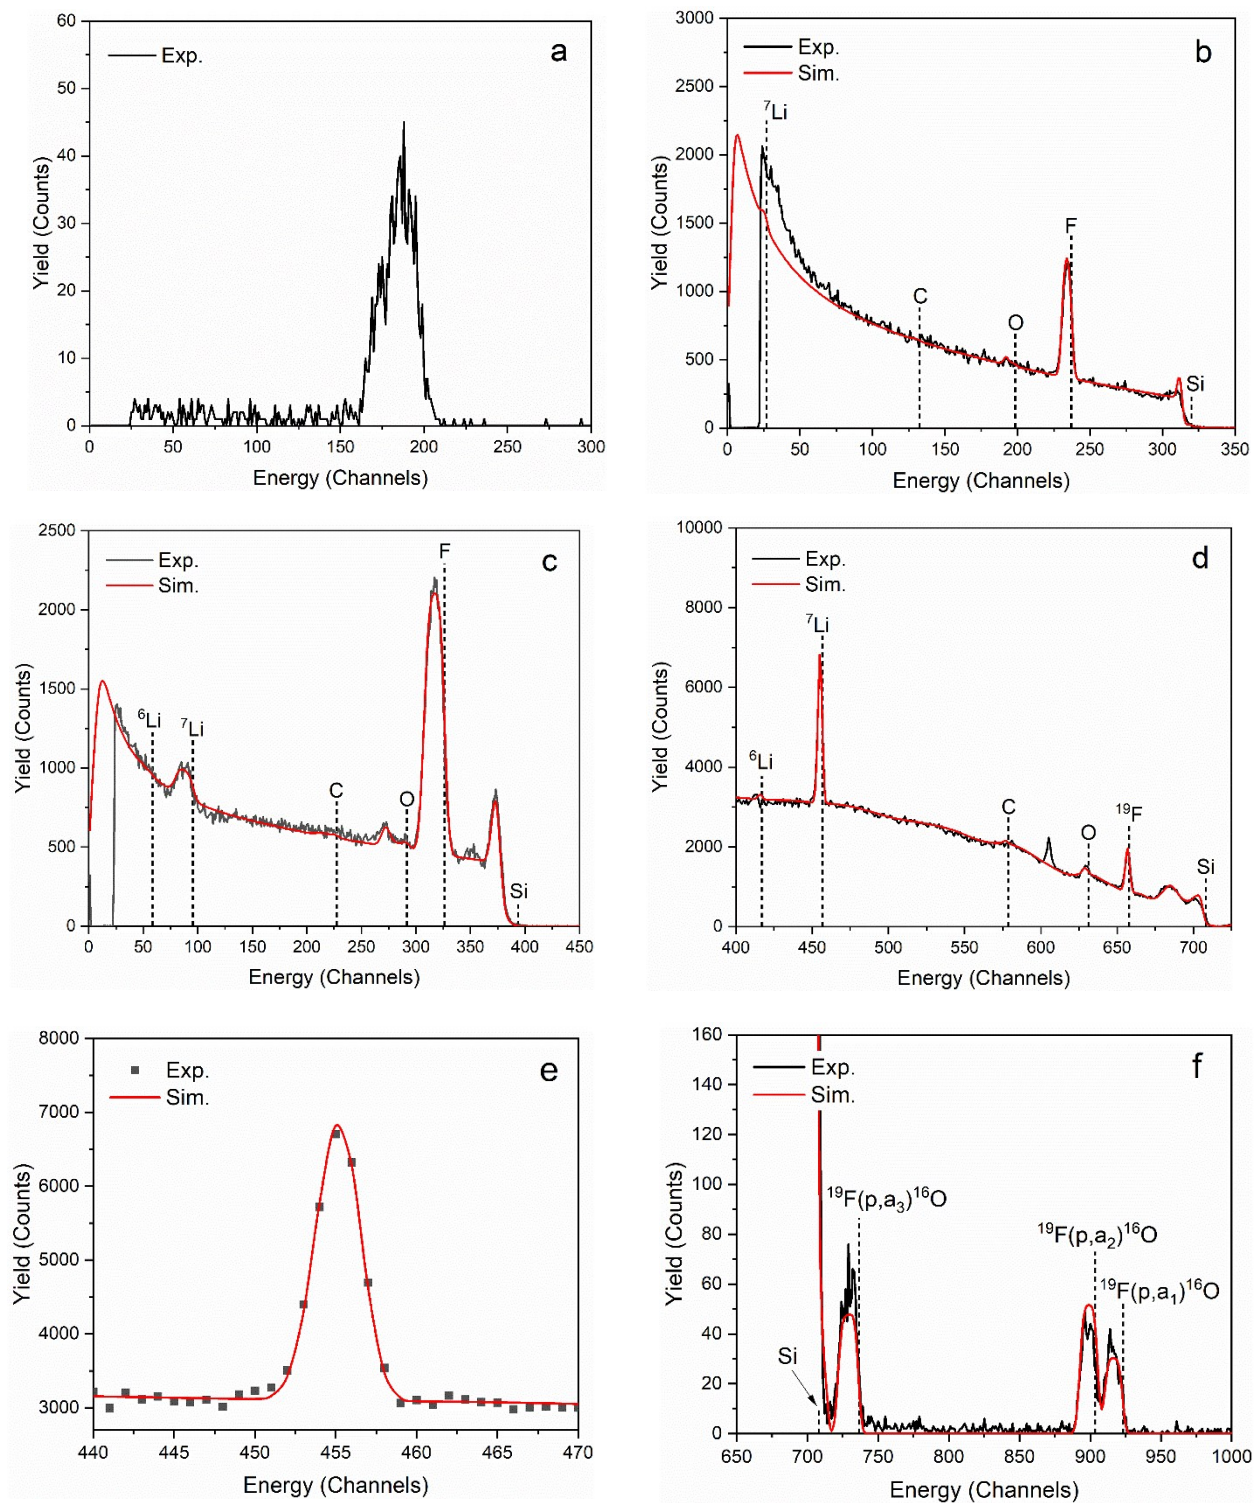

Fig. S6: Spectra from 40 nm LiF deposited at 150 °C using 3 s plasma exposure as measured with (a) Elastic Recoil Detection (ERD), (b, c) Rutherford Backscattering Spectrometry (RBS) at 170° and 107° respectively, and (d to f) Elastic Backscattering Spectrometry (EBS). The experimental spectra are plotted in black and the simulated spectra in red. Figure (e) shows the  ${}^7\text{Li}$  peak in detail and (f) zooms in on three peaks originating from nuclear reactions with  ${}^{19}\text{F}$ . The 107° RBS spectrum (c) shows also a significant Li peak which is in agreement with the EBS result. The EBS spectrum shows a peak between the C and O peak which is not simulated. The origin of this peak is unclear although its position is close to the nitrogen surface channel. RBS clearly shows the absence of N in the films. Note that the spectra for 1 s and 10 s plasma exposure are very similar and are therefore not shown.

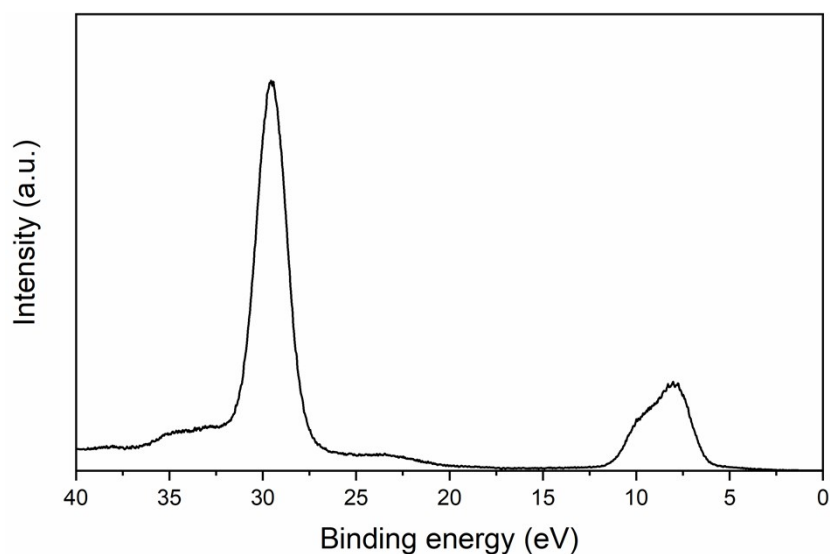

Fig. S7: XPS valence band spectrum of a LiF film grown at 150 °C using 1 s plasma exposure. The spectra for 3 s and 10 s plasma exposure are very similar and therefore not shown.

Table S3: Relevant  $m/z$  ratios, their assigned ions and their (main) assigned parent molecules.

|      |                                                  |                                                                                                                  |
|------|--------------------------------------------------|------------------------------------------------------------------------------------------------------------------|
| 15   | $\text{CH}_3^+$                                  | $\text{CH}_3\text{F}$ , $\text{CH}_4$                                                                            |
| 16   | $\text{CH}_4^+$                                  | $\text{CH}_4$                                                                                                    |
| 17   | $\text{NH}_3^+$                                  | $\text{NH}_3$                                                                                                    |
| 20   | $\text{HF}^+$ , $\text{Ar}^{++}$                 | $\text{HF}$ , $\text{Ar}$                                                                                        |
| 31   | $\text{CF}^+$                                    | $\text{CF}_4$ , $\text{CH}_x\text{F}_y$                                                                          |
| 32   | $\text{S}^+$ , $\text{CHF}^+$                    | $\text{SF}_6$ , $\text{H}_2\text{S}$ , $\text{CH}_x\text{F}_y$                                                   |
| 33   | $\text{CH}_2\text{F}^+$ , $\text{HS}^+$          | $\text{CH}_2\text{F}_2$ , $\text{CH}_3\text{F}$ , $\text{H}_2\text{S}$                                           |
| 34   | $\text{CH}_3\text{F}^+$ , $\text{H}_2\text{S}^+$ | $\text{CH}_3\text{F}$ , $\text{H}_2\text{S}$                                                                     |
| 50   | $\text{CF}_2^+$                                  | $\text{CF}_4$ , $\text{CHF}_3$ , $\text{CH}_2\text{F}_2$                                                         |
| 51   | $\text{CHF}_2^+$ , $\text{SF}^+$                 | $\text{CH}_2\text{F}_2$ , $\text{CHF}_3$ , $\text{SF}_6$                                                         |
| 52   | $\text{NF}_2^+$                                  | $\text{NF}_3$                                                                                                    |
| 65.5 | $\text{HN}(\text{SiMe}_2)_2^{2+}$                | $\text{LiN}(\text{SiMe}_3)_2$ , $\text{HN}(\text{SiMe}_3)_2$                                                     |
| 69   | $\text{CF}_3^+$                                  | $\text{CF}_4$ , $\text{CHF}_3$                                                                                   |
| 73   | $\text{SiMe}_3^+$                                | $\text{LiN}(\text{SiMe}_3)_2$ , $\text{HN}(\text{SiMe}_3)_2$ , $\text{SiMe}_3\text{F}$ , $\text{SiMe}_3\text{H}$ |
| 77   | $\text{SiMe}_2\text{F}^+$ , $\text{LiNSi}_2^+$   | $\text{SiMe}_3\text{F}$ , $\text{SiMe}_2\text{F}_2$ , $\text{LiN}(\text{SiMe}_3)_2$                              |
| 81   | $\text{SiMeF}_2^+$                               | $\text{SiMe}_2\text{F}_2$ , $\text{SiMeF}_3$                                                                     |
| 85   | $\text{SiF}_3^+$ , $\text{Me}_2\text{SiNCH}^+$   | $\text{SiF}_4^+$ , $\text{SiMeF}_3^+$ , $\text{LiN}(\text{SiMe}_3)_2$                                            |





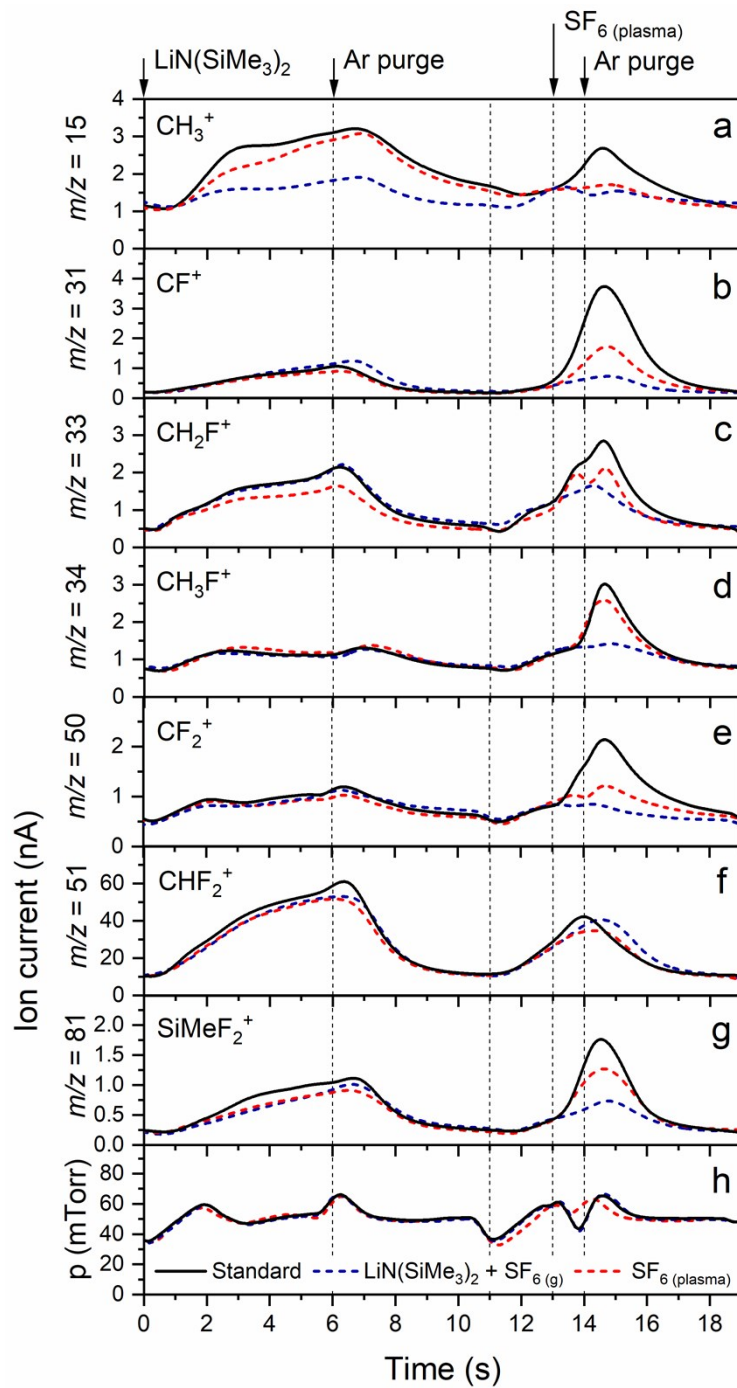

Fig. S8: Time-resolved QMS data of  $m/z = 15, 31, 33, 34, 50, 51,$  and  $81$ . The standard ALD recipe (black) is compared to the  $\text{LiN}(\text{SiMe}_3)_2 + \text{SF}_6$  recipe (blue dotted) and  $\text{SF}_6$  plasma recipe (red dotted). The precursor and coreactant dosing steps are alternated by argon purge steps of 5 s.
